# Supplementary material
Source: PubMed Central journal article supplement (PMC4147979)
Supplement: ASN.2013090945_ASN2013090945SupplementaryData1.pdf [file ASN.2013090945_ASN2013090945SupplementaryData1.pdf]

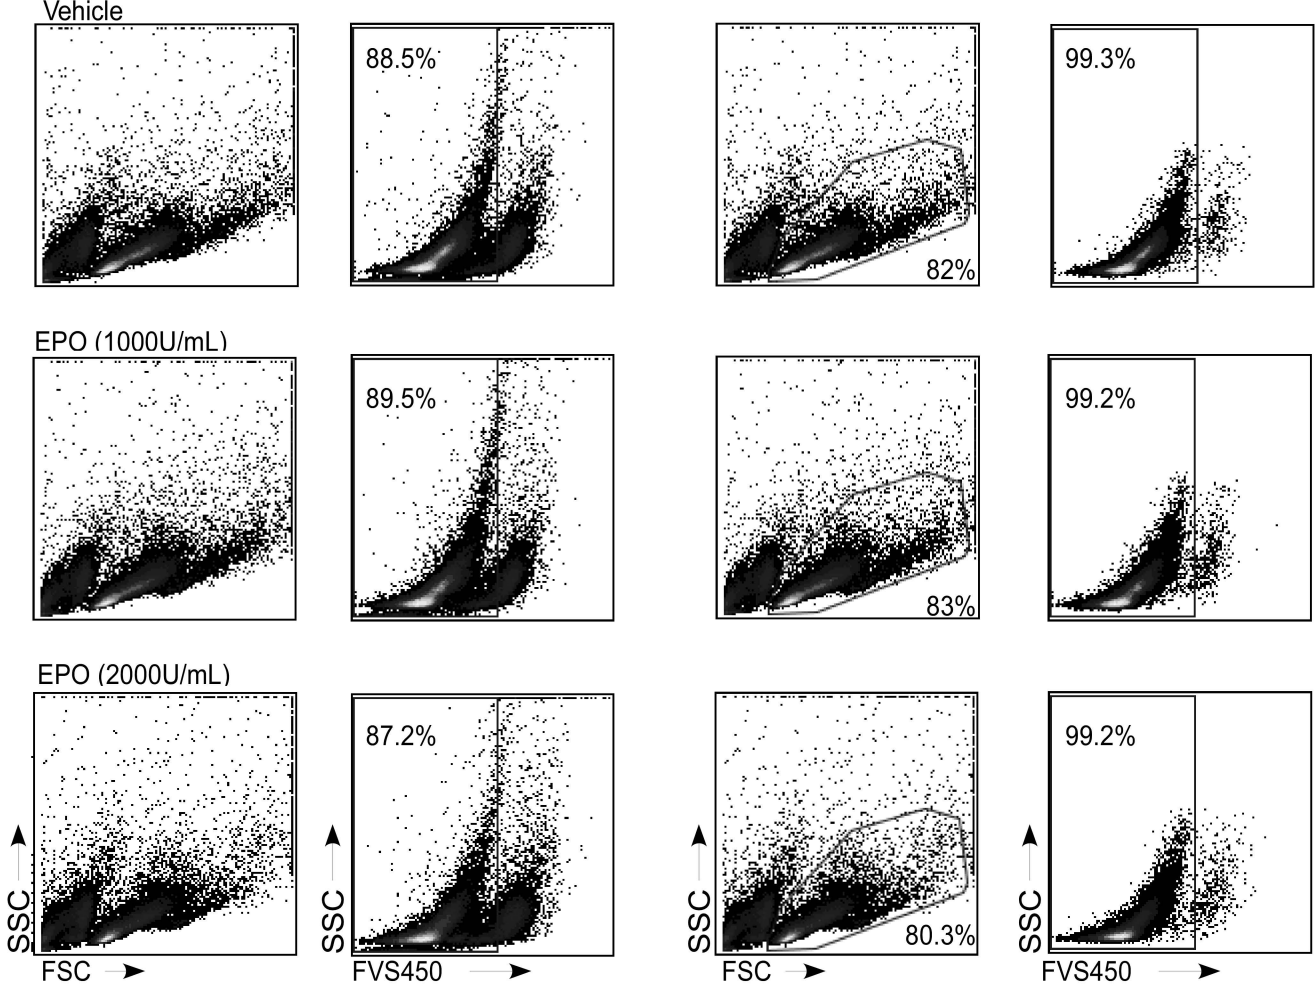

Representative plots of anti-CD3/anti-CD28 stimulated PBMC +/- EPO stained for viability dye FVS450 at day 5 of culture. The second column on the left shows viability of ungated (all) cells, while the last column shows viability of cells within the lymphocyte gate (defined in 3rd column from the left).

Supplemental Figure 1
